# Supplementary material for: Partial inhibition of Cdk1 in G2 phase overrides the SAC and decouples mitotic events
Source: PubMed Central journal article supplement — Cell Cycle. 2014 Mar 6;13(9):1400–12. doi: 10.4161/cc.28401 (PMC4050138; doi:10.4161/cc.28401), 2014-03-06
Supplement: cc-13-1400-s01.pdf [file cc-13-1400-s01.pdf]

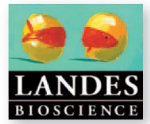

## **Supplemental Material to:**

**Rachael A McCloy, Samuel Rogers, C Elizabeth Caldon,  
Thierry Lorca, Anna Castro, Andrew Burgess**

**Partial inhibition of Cdk1 in G<sub>2</sub> phase overrides the SAC  
and decouples mitotic events**

**Cell Cycle 2014; 13(9)**

**<http://dx.doi.org/10.4161/cc.28401>**

**<http://www.landesbioscience.com/journals/cc/article/28401>**

See 2013CC5465R-VideoS1.avi
